# Supplementary material
Source: Springer Nature journal article supplement (https://www.springermedizin.de/resource/supplementary/13256_2008_1277_MOESM1_ESM.pdf/9647400)

MEDCOM RESAMPLED

[H]

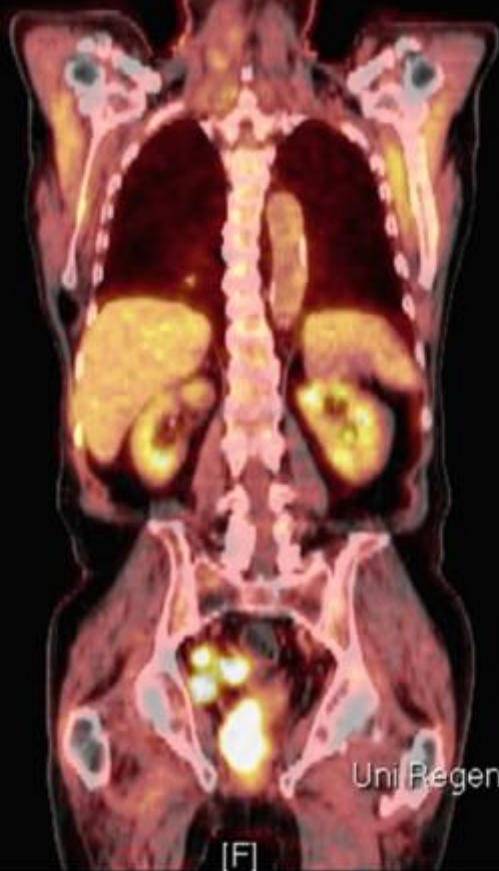

Uni Regensb

[F]

Supplement: MOESM1 [file 9647400]
